# Supplementary material
Source: PubMed Central journal article supplement (PMC4867114)
Supplement: NIHMS784437-supplement-supplemental.pdf [file NIHMS784437-supplement-supplemental.pdf]

## Supporting Information

### Targeted high resolution ion mobility separation coupled to ultra-high resolution mass spectrometry of endocrine disruptors in complex mixtures

Paolo Benigni<sup>1</sup>; Christopher J. Thompson<sup>2</sup>; Mark E. Ridgeway<sup>2</sup>,

Melvin A. Park<sup>2</sup>, and Francisco Fernandez-Lima<sup>1,3\*</sup>.

<sup>1</sup> *Department of Chemistry and Biochemistry, Florida International University, Miami, USA*

<sup>2</sup> *Bruker Daltonics Inc., Billerica, Massachusetts, USA*

<sup>3</sup> *Biomolecular Sciences Institute, Florida International University, Miami, FL 33199*

#### Table of Contents:

- 1- Additional details on the Methods
- 2- Figure S1. Relative abundance of the oxygen containing series (C<sub>x</sub>H<sub>y</sub>O<sub>1-15</sub>) identified in the SRFA sample.
- 3- Figure S2. Double Bond Equivalents (DBE) as a function of the carbon number for the oxygen containing series (C<sub>x</sub>H<sub>y</sub>O<sub>1-15</sub>) identified in the SRFA sample.
- 4- Table S1. Candidate structures geometry and atomic charges for the EDC targeted compounds.
- 5- References

## METHODS

### *Ion Mobility Spectrometry – Mass Spectrometry Separation*

The reduced mobility,  $K_0$ , of an ion in a TIMS cell is described by:

$$K_0 = \frac{v_g}{E} \frac{n}{n_0} = \frac{A}{(V_{elution} - V_{base})} \quad (1)$$

where  $v_g$ ,  $E$ ,  $n_0$ ,  $V_{elution}$  and  $V_{base}$  are the velocity of the gas, applied electric field, standard gas density, elution and base voltages, respectively. The constant  $A$  can be determined using calibration standards of known reduced mobilities.

Reduced mobility values ( $K_0$ ) were correlated with CCS ( $\Omega$ ) using the equation:

$$\Omega = \frac{(18\pi)^{1/2}}{16} \frac{ze}{(k_B T)^{1/2}} \left[ \frac{1}{m_i} + \frac{1}{m_b} \right]^{1/2} \frac{1}{K_0} \frac{1}{N^*} \quad (3)$$

where  $z$  is the charge of the ion,  $k_B$  is the Boltzmann constant,  $N^*$  is the number density and  $m_i$  and  $m_b$  refer to the masses of the ion and bath gas, respectively. <sup>1</sup>

### *Theoretical Calculations*

Candidate structures were proposed for each molecular ion observed in the IMS-FT-ICR MS experiments. The initial pool of candidate structures was obtained using serial molecular dynamics simulations of annealing and geometry optimization cycles in a NVT thermostat (equivalent to the approach described in ref <sup>2</sup>) using AMBER03 force field in YASARA software. In particular, the NVT thermostat was set to recreate the IMS cell experiment; the simulation box contained the molecular ion of interest with bath and dopant gas molecules. Final structures were optimized at the DFT/B3LYP/6-31G(d,p) level using Gaussian software.<sup>3</sup>

Vibrational frequencies were calculated to guarantee that the optimized structures correspond to a real minima in the energy space and zero-point energy corrections were applied to calculate the relative stability between the structures. Theoretical ion-neutral collision cross sections were calculated using MOBCAL<sup>4,5</sup> and IMoS (v 1.04b)<sup>6-8</sup> software for nitrogen as a bath gas at ca. 300K. In the IMoS calculations, 100 total rotations were performed using the diffuse hard sphere scattering method with a Maxwell distribution. Partial atomic charges were calculated using the Merz-Singh-Kollman scheme constrained to the molecular dipole moment.<sup>9,10</sup> All optimized geometries and partial atomic charges are provided in the supporting information.

**Figure S1.** Relative abundance of the oxygen containing series ( $C_xH_yO_{1-15}$ ) identified in the SRFA sample.

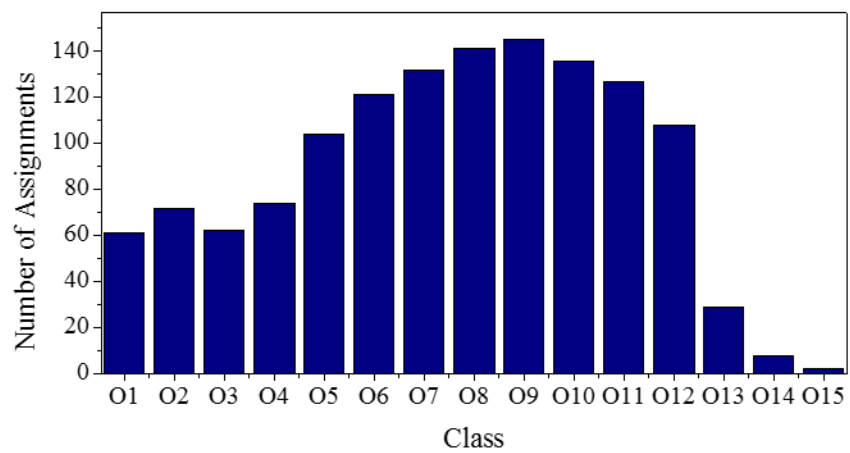

**Figure S2.** Double Bond Equivalents (DBE) as a function of the carbon number for the oxygen containing series ( $C_xH_yO_{1-15}$ ) identified in the SRFA sample.

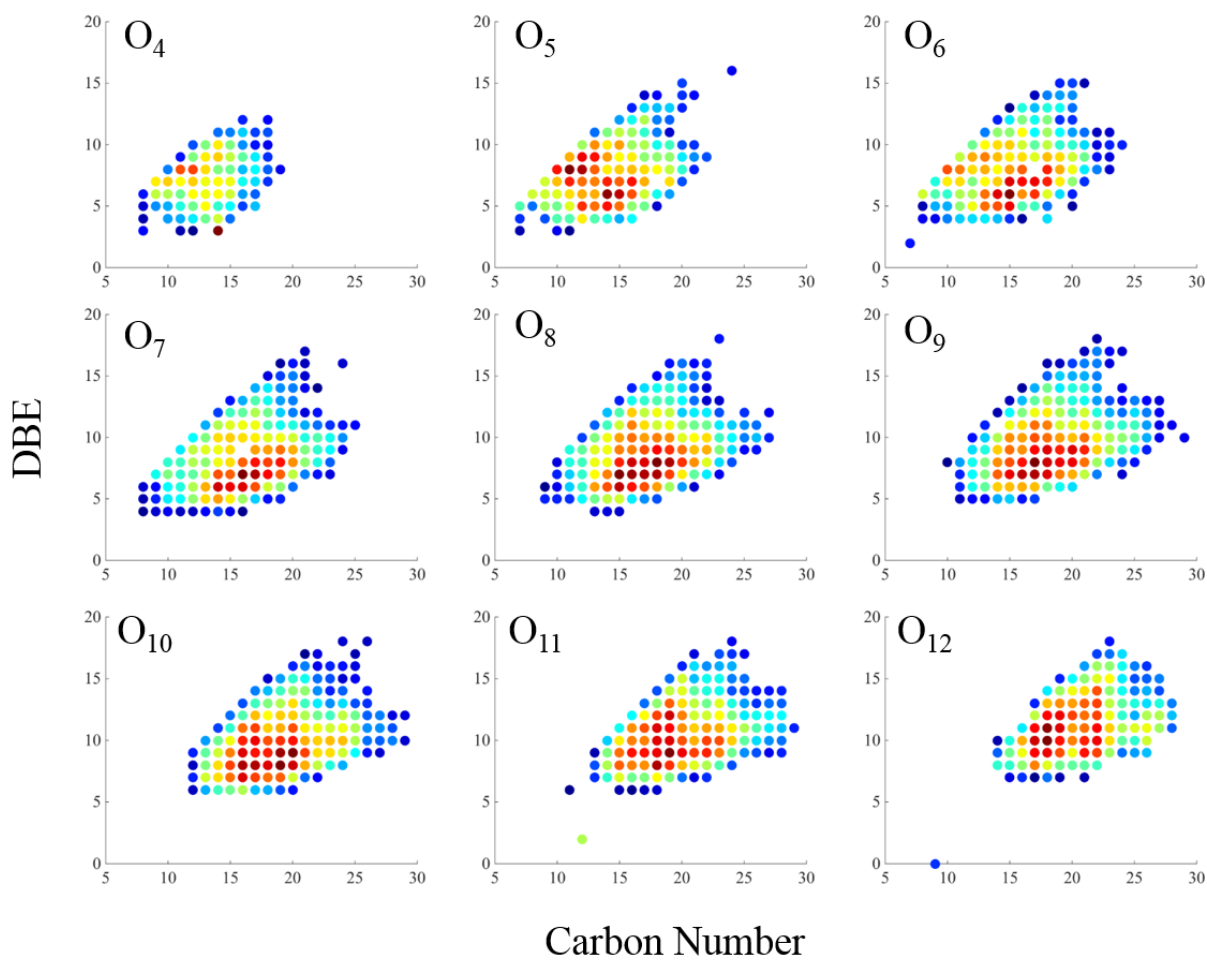

**Table S1.** Candidate structures geometry and atomic charges for the EDC targeted compounds.

hexestrol

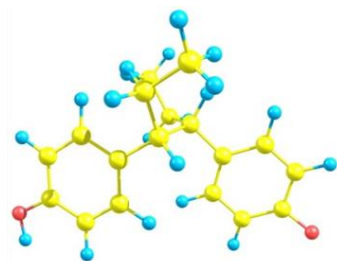

| Atom | Coordinates |          |          | Partial Charges |
|------|-------------|----------|----------|-----------------|
| C    | 0.8034      | 2.15838  | 2.24896  | -0.108          |
| C    | -0.21698    | 3.37566  | -1.59239 | -0.19335        |
| O    | 4.8143      | -2.37175 | 0.16052  | -0.58302        |
| C    | 1.53285     | 0.11356  | -0.51033 | 0.1909          |
| C    | 2.74572     | 0.63684  | -0.04164 | -0.25453        |
| C    | 1.41577     | -1.24955 | -0.77242 | -0.25405        |
| C    | 3.82829     | -0.21481 | 0.15241  | -0.19728        |
| C    | 2.4834      | -2.10793 | -0.55404 | -0.24588        |
| C    | 3.70626     | -1.58804 | -0.10714 | 0.33254         |
| C    | 0.37166     | 1.02882  | -0.7567  | -0.11688        |
| C    | -0.6334     | 1.14454  | 0.43539  | 0.0906          |
| O    | -5.18129    | -2.17482 | -0.21793 | -0.85452        |
| C    | -4.03312    | -1.4351  | -0.06098 | 0.50131         |
| C    | -4.19282    | -0.03789 | -0.06441 | -0.18143        |
| C    | -2.76328    | -2.00894 | 0.10471  | -0.21694        |
| C    | -3.07505    | 0.76602  | 0.0895   | -0.3696         |
| C    | -1.65919    | -1.18418 | 0.27951  | -0.39997        |
| C    | -1.79769    | 0.20792  | 0.24294  | 0.15352         |
| C    | 0.87728     | 2.43308  | -1.15482 | 0.25519         |
| C    | -0.00855    | 0.95028  | 1.82994  | 0.00863         |
| H    | -0.17632    | 0.60017  | -1.63563 | 0.02301         |
| H    | -1.04883    | 2.19181  | 0.39931  | 0.0272          |
| H    | 1.3658      | 1.98634  | 3.17437  | 0.00238         |
| H    | 1.54628     | 2.38337  | 1.4554   | 0.02363         |
| H    | 0.18808     | 3.05168  | 2.39506  | 0.00295         |
| H    | -0.79084    | 2.98863  | -2.43923 | 0.0401          |
| H    | -0.93574    | 3.52604  | -0.76616 | 0.02962         |
| H    | 0.17098     | 4.36532  | -1.86486 | 0.01117         |
| H    | 4.5845      | -3.26623 | -0.06084 | 0.38571         |
| H    | 2.79821     | 1.71399  | 0.20467  | 0.13639         |
| H    | 0.4566      | -1.64321 | -1.14255 | 0.16813         |
| H    | 4.75423     | 0.19555  | 0.56934  | 0.13926         |
| H    | 2.37686     | -3.16523 | -0.81444 | 0.1224          |
| H    | -5.1733     | 0.40376  | -0.28478 | 0.09234         |
| H    | -2.63893    | -3.09578 | 0.15073  | 0.08216         |
| H    | -3.15793    | 1.85975  | 0.01296  | 0.10605         |
| H    | -0.64955    | -1.62231 | 0.35621  | 0.17303         |
| H    | 1.63604     | 2.33815  | -1.9592  | -0.0789         |
| H    | 1.43387     | 2.86084  | -0.28286 | -0.06256        |
| H    | 0.66424     | 0.0692   | 1.79637  | 0.02509         |
| H    | -0.77556    | 0.69885  | 2.58441  | -0.00641        |

$\alpha$ -estradiol

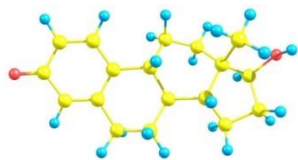

| Atom | Coordinates |          |          | Partial Charges |
|------|-------------|----------|----------|-----------------|
| O    | 0.04883     | 0.0121   | -0.01332 | -0.70981        |
| C    | 0.02021     | -0.0005  | 1.41582  | 0.43585         |
| C    | 1.39989     | -0.00471 | 2.07929  | -0.37502        |
| C    | 1.06723     | 0.28389  | 3.54576  | 0.12247         |
| C    | -0.04325    | 1.3621   | 3.48955  | -0.02663        |
| C    | -0.77078    | 1.16527  | 2.10186  | 0.2388          |
| C    | -0.6833     | 2.45003  | 1.26056  | -0.35231        |
| C    | -2.24258    | 0.77119  | 2.32073  | -0.02242        |
| C    | -3.02893    | 1.74555  | 3.21893  | -0.04844        |
| C    | -2.19706    | 2.29923  | 4.41389  | 0.23056         |
| C    | -3.03682    | 2.59354  | 5.65075  | -0.34997        |
| C    | -4.28218    | 3.24527  | 5.53244  | -0.0108         |
| C    | -5.05333    | 3.60151  | 6.62658  | -0.51027        |
| C    | -0.99825    | 1.37092  | 4.69583  | 0.04208         |
| C    | -0.30212    | 1.77913  | 5.99718  | -0.07501        |
| C    | -1.25462    | 1.62917  | 7.18442  | 0.02157         |
| C    | -2.58575    | 2.32847  | 6.96122  | 0.17201         |
| C    | -3.35124    | 2.68446  | 8.06997  | -0.53202        |
| C    | -4.63464    | 3.33601  | 7.98515  | 0.75933         |
| O    | -5.32805    | 3.65268  | 9.00102  | -0.82494        |
| H    | 0.46141     | 0.83509  | -0.29709 | 0.37772         |
| H    | -0.48326    | -0.9425  | 1.65551  | 0.01289         |
| H    | 1.93682     | -0.9433  | 1.91609  | 0.07261         |
| H    | 2.01365     | 0.80336  | 1.65842  | 0.06573         |
| H    | 0.68279     | -0.62535 | 4.0246   | -0.04193        |
| H    | 1.93498     | 0.60562  | 4.12584  | -0.00845        |
| H    | 0.44734     | 2.34433  | 3.46794  | -0.01749        |
| H    | -1.20288    | 2.3395   | 0.30335  | 0.06274         |
| H    | -1.13929    | 3.28702  | 1.79337  | 0.07455         |
| H    | 0.35801     | 2.73313  | 1.06033  | 0.0474          |
| H    | -2.73919    | 0.65812  | 1.34911  | -0.02005        |
| H    | -2.25963    | -0.22349 | 2.78074  | -0.04855        |
| H    | -3.41475    | 2.57823  | 2.62264  | 0.00963         |
| H    | -3.90827    | 1.22642  | 3.61086  | 0.00233         |
| H    | -1.74775    | 3.24987  | 4.07204  | -0.04135        |
| H    | -4.65788    | 3.48835  | 4.53877  | 0.05393         |
| H    | -6.009      | 4.10159  | 6.48661  | 0.12489         |
| H    | -1.38048    | 0.34858  | 4.84231  | 0.00823         |
| H    | 0.60021     | 1.17566  | 6.15889  | -0.0223         |
| H    | 0.02498     | 2.82511  | 5.91218  | 0.00443         |
| H    | -1.42348    | 0.55669  | 7.36411  | -0.01613        |
| H    | -0.78717    | 2.01686  | 8.09633  | 0.00054         |
| H    | -2.97814    | 2.46654  | 9.06965  | 0.11362         |



bisphenol A

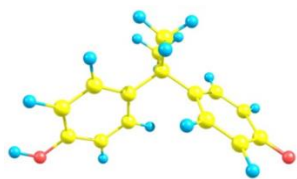

| Atom | Coordinates |          |          | Partial Charges |
|------|-------------|----------|----------|-----------------|
| C    | 0.06363     | 0.01932  | 0.04499  | -0.32861        |
| C    | 0.02513     | -0.00237 | 1.59253  | 0.44587         |
| C    | 1.49503     | 0.02355  | 2.07974  | -0.28817        |
| C    | -0.66097    | -1.26344 | 2.13768  | 0.0274          |
| C    | -0.85368    | -1.42056 | 3.52668  | -0.17188        |
| C    | -1.43697    | -2.54946 | 4.07914  | -0.43208        |
| C    | -1.89724    | -3.66433 | 3.27861  | 0.70566         |
| C    | -1.69266    | -3.47224 | 1.86297  | -0.39056        |
| C    | -1.10419    | -2.32845 | 1.333    | -0.2722         |
| O    | -2.42975    | -4.70344 | 3.77598  | -0.81462        |
| C    | -0.73907    | 1.26477  | 2.03276  | 0.05477         |
| C    | -2.14195    | 1.29103  | 1.9498   | -0.20249        |
| C    | -2.88173    | 2.42279  | 2.27544  | -0.23879        |
| C    | -2.22727    | 3.57516  | 2.71443  | 0.42191         |
| C    | -0.84037    | 3.57804  | 2.8187   | -0.40027        |
| C    | -0.11125    | 2.43273  | 2.47586  | -0.15015        |
| O    | -2.99964    | 4.67533  | 3.03757  | -0.60259        |
| H    | 0.54567     | 0.93865  | -0.30321 | 0.04047         |
| H    | 0.63089     | -0.83177 | -0.34303 | 0.06067         |
| H    | -0.94079    | -0.01724 | -0.38336 | 0.0446          |
| H    | 1.55347     | 0.0863   | 3.16889  | 0.02942         |
| H    | 1.9827      | -0.9059  | 1.77643  | 0.04747         |
| H    | 2.06454     | 0.85816  | 1.65156  | 0.02636         |
| H    | -0.54491    | -0.61924 | 4.19796  | 0.09518         |
| H    | -1.5691     | -2.62429 | 5.15613  | 0.11752         |
| H    | -2.02111    | -4.26996 | 1.20057  | 0.10107         |
| H    | -0.99117    | -2.27596 | 0.25304  | 0.12381         |
| H    | -2.66078    | 0.38801  | 1.647    | 0.13939         |
| H    | -3.96454    | 2.41908  | 2.21062  | 0.15299         |
| H    | -0.32117    | 4.46737  | 3.17079  | 0.14619         |
| H    | 0.96736     | 2.47124  | 2.5709   | 0.12542         |
| H    | -2.41675    | 5.37531  | 3.34904  | 0.38623         |

17- $\alpha$ - Ethynylestradiol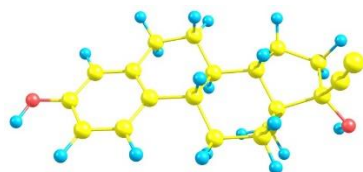

| Atom | Coordinates |          |          | Partial Charges |
|------|-------------|----------|----------|-----------------|
| O    | -6.31537    | -0.18184 | -0.16129 | -0.59389        |
| C    | -4.94435    | -0.28703 | -0.03928 | 0.43473         |
| C    | -4.19663    | 0.88466  | -0.05573 | -0.35196        |
| C    | -2.80173    | 0.85445  | 0.06373  | 0.15109         |
| C    | -2.12829    | -0.3771  | 0.20345  | -0.10616        |
| C    | -2.90867    | -1.54159 | 0.22159  | -0.05672        |
| C    | -4.29678    | -1.51284 | 0.10194  | -0.43044        |
| C    | -0.61003    | -0.43838 | 0.38229  | 0.02366         |
| C    | 0.04981     | -1.70492 | -0.20717 | 0.03103         |
| C    | 1.57611     | -1.7413  | 0.00901  | -0.27009        |
| C    | 2.26078     | -0.46364 | -0.48605 | 0.91017         |
| C    | 1.576       | 0.7526   | 0.17922  | 0.01049         |
| C    | 2.50637     | 1.94114  | -0.13682 | -0.22884        |
| C    | 3.92548     | 1.31021  | -0.21393 | 0.07504         |
| C    | 3.75045     | -0.23694 | 0.01525  | -0.21566        |
| C    | 3.91077     | -0.58534 | 1.42084  | 0.49672         |
| C    | 3.9238      | -0.79025 | 2.65084  | -1.09294        |
| O    | 4.7174      | -0.9886  | -0.77094 | -0.71367        |
| C    | 0.08243     | 0.85051  | -0.12667 | 0.07903         |
| C    | -0.6018     | 2.06817  | 0.50009  | 0.04711         |
| C    | -2.0504     | 2.17318  | 0.02108  | -0.1237         |
| C    | 2.21129     | -0.41162 | -2.02854 | -0.64517        |
| H    | -0.41767    | -0.46814 | 1.46607  | 0.01222         |
| H    | 1.67255     | 0.56862  | 1.25637  | 0.00821         |
| H    | -0.06806    | 0.91783  | -1.21589 | -0.04855        |
| H    | -6.69499    | -1.06558 | -0.11813 | 0.38978         |
| H    | -4.71419    | 1.83358  | -0.16028 | 0.16244         |
| H    | -2.42669    | -2.5048  | 0.33658  | 0.10935         |
| H    | -4.86732    | -2.4386  | 0.12138  | 0.15244         |
| H    | -0.37825    | -2.59809 | 0.25859  | 0.00509         |
| H    | -0.20035    | -1.77122 | -1.27447 | -0.04177        |
| H    | 1.80489     | -1.84865 | 1.07407  | 0.04333         |
| H    | 1.99513     | -2.62131 | -0.49305 | 0.00619         |
| H    | 2.23513     | 2.41593  | -1.08804 | 0.01384         |
| H    | 2.44595     | 2.71542  | 0.632    | 0.03501         |
| H    | 4.37796     | 1.49493  | -1.19665 | -0.03201        |
| H    | 4.60538     | 1.70863  | 0.53731  | -0.00291        |
| H    | 4.70365     | -0.63194 | -1.66631 | 0.40495         |
| H    | -0.56812    | 1.97709  | 1.59322  | -0.01649        |
| H    | -0.06473    | 2.98724  | 0.24549  | -0.01475        |
| H    | -2.058      | 2.53974  | -1.01476 | 0.03362         |
| H    | -2.6008     | 2.91919  | 0.60571  | 0.02818         |
| H    | 2.73125     | -1.27978 | -2.44488 | 0.0985          |
| H    | 1.18711     | -0.44036 | -2.40875 | 0.1125          |
| H    | 2.67632     | 0.48995  | -2.43854 | 0.11098         |

estrone

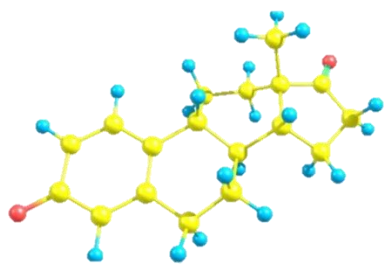

| Atom | Coordinates |          |          | Partial Charges |
|------|-------------|----------|----------|-----------------|
| O    | -0.02394    | -0.08503 | -0.00103 | -0.54838        |
| C    | -0.00862    | -0.03456 | 1.21123  | 0.46002         |
| C    | 1.25924     | -0.01154 | 2.08071  | 0.39826         |
| C    | 2.13211     | 1.20697  | 1.70867  | -0.12628        |
| C    | 3.35511     | 1.36362  | 2.63859  | 0.04215         |
| C    | 3.08468     | 0.94533  | 4.11289  | 0.09068         |
| C    | 3.97426     | 1.66656  | 5.11795  | -0.2525         |
| C    | 5.35398     | 1.8247   | 4.86946  | -0.06731        |
| C    | 6.22051     | 2.41155  | 5.77646  | -0.48002        |
| C    | 5.77523     | 2.90492  | 7.06118  | 0.76769         |
| O    | 6.55306     | 3.44841  | 7.90457  | -0.82778        |
| C    | 4.36469     | 2.71222  | 7.28912  | -0.55554        |
| C    | 3.50181     | 2.12363  | 6.36682  | 0.1763          |
| C    | 2.02916     | 1.99699  | 6.72313  | -0.00753        |
| C    | 1.31895     | 0.90924  | 5.91655  | -0.09923        |
| C    | 1.58375     | 1.09493  | 4.42005  | -0.01619        |
| C    | 0.73755     | 0.14396  | 3.54777  | 0.10156         |
| C    | -0.74269    | 0.59471  | 3.41994  | -0.03949        |
| C    | -1.24414    | 0.0001   | 2.10113  | -0.29271        |
| C    | 2.01312     | -1.33166 | 1.82442  | -0.34293        |
| H    | 2.43996     | 1.12583  | 0.66181  | -0.00129        |
| H    | 1.51217     | 2.10909  | 1.77141  | -0.00398        |
| H    | 4.19594     | 0.78724  | 2.24227  | -0.00338        |
| H    | 3.67363     | 2.4099   | 2.62399  | -0.01412        |
| H    | 3.29523     | -0.13649 | 4.18392  | -0.01351        |
| H    | 5.76492     | 1.46634  | 3.92591  | 0.06935         |
| H    | 7.27713     | 2.51435  | 5.54042  | 0.11656         |
| H    | 3.9721      | 3.05576  | 8.24503  | 0.12084         |
| H    | 1.92909     | 1.79934  | 7.79603  | 0.01217         |
| H    | 1.51948     | 2.95553  | 6.54385  | -0.00496        |
| H    | 1.68666     | -0.0807  | 6.22081  | 0.02165         |
| H    | 0.24081     | 0.92563  | 6.12375  | -0.00678        |
| H    | 1.29792     | 2.12826  | 4.16857  | 0.02054         |
| H    | 0.75385     | -0.84864 | 4.01801  | -0.0599         |
| H    | -1.34276    | 0.29076  | 4.27982  | 0.02333         |
| H    | -0.78741    | 1.68838  | 3.36962  | 0.00463         |
| H    | -2.06338    | 0.53665  | 1.61823  | 0.0876          |
| H    | -1.56969    | -1.04075 | 2.23342  | 0.07626         |
| H    | 2.27349     | -1.41618 | 0.76587  | 0.06878         |
| H    | 2.92859     | -1.38397 | 2.41581  | 0.06163         |
| H    | 1.39516     | -2.1956  | 2.09224  | 0.04378         |

(E)-diethylstilbestrol

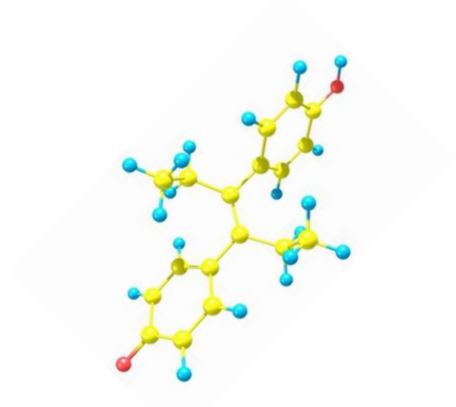

| Atom | Coordinates |          |          | Partial Charges |
|------|-------------|----------|----------|-----------------|
| O    | 0.35169     | 0.11722  | 0.00505  | -0.79451        |
| C    | 0.32226     | 0.10512  | 1.26863  | 0.77529         |
| C    | 1.06025     | 1.04425  | 2.08879  | -0.47607        |
| C    | 1.0055      | 1.0325   | 3.46875  | -0.04206        |
| C    | 0.23684     | 0.09375  | 4.20139  | -0.09809        |
| C    | 0.19769     | 0.07428  | 5.67122  | -0.03201        |
| C    | 0.11077     | 1.19439  | 6.45871  | -0.33393        |
| C    | 0.29771     | 1.14449  | 7.93657  | 0.20651         |
| C    | 1.49658     | 0.6923   | 8.52076  | -0.25161        |
| C    | 1.69862     | 0.68211  | 9.89952  | -0.2115         |
| C    | 0.69519     | 1.14563  | 10.74921 | 0.42217         |
| O    | 0.93416     | 1.12228  | 12.11084 | -0.61866        |
| C    | -0.49814    | 1.62081  | 10.20655 | -0.51349        |
| C    | -0.68534    | 1.61933  | 8.82379  | 0.05882         |
| C    | -0.27337    | 2.57724  | 5.92383  | 0.33861         |
| C    | -1.68138    | 2.64623  | 5.30687  | -0.16906        |
| C    | 0.18003     | -1.31596 | 6.31485  | 0.11831         |
| C    | -1.20429    | -1.74644 | 6.83327  | -0.01346        |
| C    | -0.45436    | -0.86677 | 3.41723  | -0.0674         |
| C    | -0.43531    | -0.86211 | 2.03571  | -0.47209        |
| H    | 1.69287     | 1.76166  | 1.57178  | 0.11777         |
| H    | 1.62139     | 1.74198  | 4.01442  | 0.0818          |
| H    | 2.29684     | 0.35496  | 7.87049  | 0.13305         |
| H    | 2.63423     | 0.33314  | 10.32375 | 0.14521         |
| H    | 0.15897     | 1.47146  | 12.56242 | 0.40582         |
| H    | -1.28618    | 1.98714  | 10.86167 | 0.16107         |
| H    | -1.62588    | 1.98701  | 8.42668  | 0.09097         |
| H    | -0.21295    | 3.29389  | 6.74966  | -0.11902        |
| H    | 0.44396     | 2.93117  | 5.18079  | -0.03263        |
| H    | -1.90217    | 3.66098  | 4.95585  | -0.00267        |
| H    | -1.76464    | 1.96763  | 4.4562   | 0.06269         |
| H    | -2.44812    | 2.36711  | 6.03789  | 0.00441         |
| H    | 0.53189     | -2.04383 | 5.58023  | -0.04081        |
| H    | 0.88375     | -1.36139 | 7.14832  | -0.00181        |
| H    | -1.16952    | -2.76507 | 7.23759  | -0.02402        |
| H    | -1.55025    | -1.08088 | 7.62856  | -0.02695        |
| H    | -1.95132    | -1.7259  | 6.03506  | -0.0091         |
| H    | -1.05118    | -1.62765 | 3.91534  | 0.11356         |
| H    | -0.99735    | -1.60633 | 1.47685  | 0.11491         |

(Z)-diethylstilbestrol

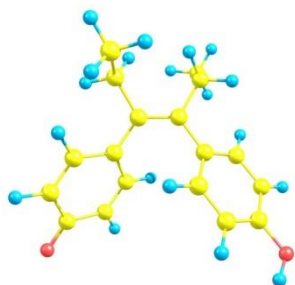

| Atom | Coordinates |          |          | Partial Charges |
|------|-------------|----------|----------|-----------------|
| O    | -3.88502    | -3.2652  | -0.56398 | -0.78584        |
| C    | -3.19784    | -2.21287 | -0.4369  | 0.74015         |
| C    | -1.97769    | -1.96663 | -1.1808  | -0.38152        |
| C    | -1.22621    | -0.82173 | -1.02247 | -0.11381        |
| C    | -1.59057    | 0.21965  | -0.12925 | -0.09566        |
| C    | -0.79002    | 1.43687  | 0.02821  | 0.04389         |
| C    | 0.58264     | 1.50073  | -0.05229 | -0.47061        |
| C    | 1.47904     | 0.32143  | 0.05923  | 0.41532         |
| C    | 2.70728     | 0.24279  | -0.62706 | -0.31918        |
| C    | 3.59325     | -0.82466 | -0.46256 | -0.25034        |
| C    | 3.27521     | -1.85558 | 0.41394  | 0.41119         |
| O    | 4.17016     | -2.90178 | 0.55197  | -0.6106         |
| C    | 2.07373     | -1.80183 | 1.12612  | -0.33843        |
| C    | 1.19927     | -0.73701 | 0.94855  | -0.2648         |
| C    | 1.29835     | 2.83894  | -0.22171 | 0.2861          |
| C    | 1.34015     | 3.36324  | -1.67135 | -0.17192        |
| C    | -1.58421    | 2.72319  | 0.27353  | 0.12693         |
| C    | -1.58146    | 3.19444  | 1.74009  | -0.11635        |
| C    | -2.8083     | 0.01967  | 0.57391  | -0.13293        |
| C    | -3.56599    | -1.12858 | 0.4505   | -0.436          |
| H    | -1.67704    | -2.72406 | -1.90033 | 0.09828         |
| H    | -0.33121    | -0.69787 | -1.62484 | 0.12541         |
| H    | 2.98332     | 1.02291  | -1.32736 | 0.16927         |
| H    | 4.52426     | -0.86489 | -1.01839 | 0.14418         |
| H    | 3.77027     | -3.56603 | 1.12278  | 0.38715         |
| H    | 1.81739     | -2.59806 | 1.82176  | 0.14722         |
| H    | 0.27057     | -0.72413 | 1.50462  | 0.19181         |
| H    | 0.83598     | 3.60694  | 0.40463  | -0.02513        |
| H    | 2.3252      | 2.74571  | 0.14664  | -0.06949        |
| H    | 1.8718      | 4.3212   | -1.73116 | -0.00207        |
| H    | 1.84256     | 2.65801  | -2.33917 | 0.02394         |
| H    | 0.33029     | 3.51108  | -2.0642  | 0.03609         |
| H    | -1.205      | 3.53227  | -0.35728 | -0.00316        |
| H    | -2.6168     | 2.5629   | -0.04347 | -0.02995        |
| H    | -2.1707     | 4.11159  | 1.85857  | 0.00113         |
| H    | -2.00963    | 2.43301  | 2.3972   | 0.00981         |
| H    | -0.56717    | 3.39668  | 2.09598  | 0.0148          |
| H    | -3.15376    | 0.78356  | 1.26679  | 0.13667         |
| H    | -4.48129    | -1.24729 | 1.02504  | 0.10846         |

References:

- (1) McDaniel, E. W.; Mason, E. A. *Mobility and diffusion of ions in gases*; John Wiley and Sons, Inc., New York: New York, 1973.
- (2) Fernandez-Lima, F. A.; Wei, H.; Gao, Y. Q.; Russell, D. H. *J. Phys. Chem. A* **2009**, *113*, 8221.
- (3) Frisch, M. J.; Trucks, G. W.; Schlegel, H. B.; Scuseria, G. E.; Robb, M. A.; Cheeseman, J. R.; Montgomery, J., J. A.; Vreven, T.; Kudin, K. N.; Burant, J. C.; Millam, J. M.; Iyengar, S. S.; Tomasi, J.; Barone, V.; Mennucci, B.; Cossi, M.; Scalmani, G.; Rega, N.; Petersson, G. A.; Nakatsuji, H.; Hada, M.; Ehara, M.; Toyota, K.; Fukuda, R.; Hasegawa, J.; Ishida, M.; Nakajima, T.; Honda, Y.; Kitao, O.; Nakai, H.; Klene, M.; Li, X.; Knox, J. E.; Hratchian, H. P.; Cross, J. B.; Bakken, V.; Adamo, C.; Jaramillo, J.; Gomperts, R.; Stratmann, R. E.; Yazyev, O.; Austin, A. J.; Cammi, R.; Pomelli, C.; Ochterski, J. W.; Ayala, P. Y.; Morokuma, K.; Voth, G. A.; Salvador, P.; Dannenberg, J. J.; Zakrzewski, V. G.; Dapprich, S.; Daniels, A. D.; Strain, M. C.; Farkas, O.; Malick, D. K.; Rabuck, A. D.; Raghavachari, K.; Foresman, J. B.; Ortiz, J. V.; Cui, Q.; Baboul, A. G.; Clifford, S.; Cioslowski, J.; Stefanov, B. B.; Liu, G.; Liashenko, A.; Piskorz, P.; Komaromi, I.; Martin, R. L.; Fox, D. J.; Keith, T.; Al-Laham, M. A.; Peng, C. Y.; Nanayakkara, A.; Challacombe, M.; Gill, P. M. W.; Johnson, B.; Chen, W.; Wong, M. W.; Gonzalez, C.; Pople, J. A. In *Gaussian, Inc.* Wallingford CT, 2004.
- (4) Campuzano, I.; Bush, M. F.; Robinson, C. V.; Beaumont, C.; Richardson, K.; Kim, H.; Kim, H. I. *Analytical Chemistry* **2011**, *84*, 1026.
- (5) Kim, H. I.; Kim, H.; Pang, E. S.; Ryu, E. K.; Beegle, L. W.; Loo, J. A.; Goddard, W. A.; Kanik, I. *Anal. Chem.* **2009**, *81*, 8289.
- (6) Larriba, C.; Hogan, C. J. *The Journal of Physical Chemistry A* **2013**, *117*, 3887.
- (7) Larriba, C.; Hogan Jr, C. J. *Journal of Computational Physics* **2013**, *251*, 344.
- (8) Ouyang, H.; Larriba-Andaluz, C.; Oberreit, D.; Hogan, C., Jr. *Journal of The American Society for Mass Spectrometry* **2013**, *24*, 1833.
- (9) Singh, U. C.; Kollman, P. A. *Journal of Computational Chemistry* **1984**, *5*, 129.
- (10) Besler, B. H.; Merz, K. M.; Kollman, P. A. *Journal of Computational Chemistry* **1990**, *11*, 431.
